# Supplementary material for: Selective attention on representations in working memory: cognitive and neural mechanisms
Source: PeerJ. 2018 Apr 2;6:e4585. doi: 10.7717/peerj.4585 (PMC5885971; doi:10.7717/peerj.4585)
Supplement: Data S1 — Numbers of publications searching from the Web of Science between 1970 and 2016 using topic of “working memory”, or “selective attention”, or conjunction search of the two. [file peerj-06-4585-s001.xlsx]

## Sheet: "working memory"
Publication year	Number of publications
1970	0
1971	2
1972	0
1973	0
1974	0
1975	0
1976	2
1977	0
1978	2
1979	13
1980	6
1981	10
1982	18
1983	12
1984	24
1985	27
1986	14
1987	26
1988	37
1989	39
1990	59
1991	182
1992	261
1993	274
1994	347
1995	423
1996	593
1997	599
1998	782
1999	982
2000	1176
2001	1230
2002	1267
2003	1558
2004	1920
2005	2129
2006	2337
2007	2616
2008	2960
2009	3181
2010	3568
2011	3733
2012	3981
2013	4569
2014	4832
2015	5134
2016	5331

## Sheet: "selective attention"
Publication year	Number of publications
1970	17
1971	15
1972	18
1973	14
1974	11
1975	19
1976	33
1977	24
1978	26
1979	23
1980	34
1981	32
1982	31
1983	14
1984	23
1985	28
1986	31
1987	41
1988	36
1989	29
1990	41
1991	149
1992	162
1993	203
1994	204
1995	225
1996	264
1997	291
1998	315
1999	376
2000	418
2001	405
2002	421
2003	464
2004	476
2005	539
2006	578
2007	620
2008	676
2009	791
2010	804
2011	798
2012	859
2013	883
2014	919
2015	916
2016	918

## Sheet: Conjunction search of the two
Publication year	Number of publications
1990	1
1991	2
1992	6
1993	0
1994	4
1995	9
1996	9
1997	22
1998	21
1999	32
2000	33
2001	40
2002	42
2003	70
2004	66
2005	79
2006	88
2007	116
2008	115
2009	142
2010	173
2011	175
2012	168
2013	187
2014	201
2015	205
2016	193
